# Supplementary material
Source: HighWire-hosted journal article supplement (https://bmjopen.bmj.com/content/9/5/e025567)
Supplement: inline-supplementary-material-1 [file inline-supplementary-material-1.pdf]

## SUPPLEMENTARY APPENDIX

**Table S1. Opioid poisoning codes**

ICD-10 codes indicating opioid poisoning, by category:[2]

| Description                            | ICD-10 codes |
|----------------------------------------|--------------|
| Poisoning by opium                     | T40.0        |
| Poisoning by heroin                    | T40.1        |
| Poisoning by other opioids*            | T40.2        |
| Poisoning by methadone                 | T40.3        |
| Poisoning by synthetic opioid†         | T40.4        |
| Poisoning by unspecified/other opioids | T40.6        |

\*includes codeine, hydromorphone, morphine and oxycodone †includes buprenorphine, fentanyl, pethidine and tramadol

Accidental opioid poisoning was defined by meeting both of the following criteria.

- A hospital admission record is coded with an ICD-10 code opioid poisoning (**T40.0, T40.1, T40.2, T40.3, T40.4, or T40.6**). For hospital admissions related to accidental opioid poisoning, the hospital diagnosis type must also be coded as M (most responsible diagnosis); 1 (pre-admit comorbidity); W, X or Y (service transfer diagnoses); or 6 (proxy most responsible diagnosis).
- The hospital admission record is also coded with an external cause ICD-10 code corresponding to accidental opioid poisoning (**X42, Accidental poisoning by and exposure to narcotics and psychodysleptics [hallucinogens], not elsewhere classified**). Note: This is distinguished from codes corresponding to intentional self-harm (X62), harm from therapeutic use (Y45.0), or unknown intent (Y12).

**Table S2. Diagnostic codes for exclusions**

| Description                                                                              | ICD-9         | ICD-10            |
|------------------------------------------------------------------------------------------|---------------|-------------------|
| Encephalopathy (anoxic brain damage, toxic encephalopathy or unspecified encephalopathy) | 348.1, 349.82 | G93.1, G92, G93.4 |
| Acute respiratory distress syndrome (ARDS)                                               | 518.82        | J80               |
| Respiratory failure                                                                      | 518.81        | J96.0, J96.9      |
| Pulmonary hemorrhage                                                                     | 770.3         | R04.8             |

|                           |              |                     |
|---------------------------|--------------|---------------------|
| Aspiration pneumonia      | 507.0        | J69.0               |
| Cardiac arrest            | 427.5        | I46                 |
| Ventricular arrhythmia    | 427.1, 427.4 | I47.0, I47.2, I49.0 |
| Heart failure             | 428          | I50                 |
| Rhabdomyolysis            | 728.88       | M62.8, T79.6        |
| Paraplegia or tetraplegia | 344.0, 344.1 | G82                 |
| Acute renal failure       | 584          | N17                 |
| Intentional self-harm     | n/a†         | X60 – X84           |

†Only hospital diagnoses were used for identifying intentional self-harm, because E-codes which could be used are only supplementary codes and MSP data are typically coded with only one diagnostic code.

**Table S3. Diagnostic codes for outcomes**

| Type of outcome | Diagnosis                                                                                | ICD-10 Codes        |
|-----------------|------------------------------------------------------------------------------------------|---------------------|
| Neurological    | Encephalopathy (anoxic brain damage, toxic encephalopathy or unspecified encephalopathy) | G93.1, G92, G93.4   |
| Pulmonary       | Adult respiratory distress syndrome (ARDS)                                               | J80                 |
|                 | Respiratory failure                                                                      | J96.0, J96.9        |
|                 | Pulmonary hemorrhage                                                                     | R04.8               |
|                 | Aspiration pneumonia                                                                     | J69.0               |
| Cardiac         | Cardiac arrest                                                                           | I46                 |
|                 | Ventricular arrhythmia                                                                   | I47.0, I47.2, I49.0 |
|                 | Heart failure                                                                            | I50                 |
| Other           | Rhabdomyolysis                                                                           | M62.8, T79.6        |
|                 | Paraplegia or tetraplegia                                                                | G82                 |
|                 | Acute renal failure                                                                      | N17                 |

**Table S4. Diagnostic codes for covariates**

| Description                                                       | Subcategory (if applicable)                                                                                                | ICD codes                                                                                                           |
|-------------------------------------------------------------------|----------------------------------------------------------------------------------------------------------------------------|---------------------------------------------------------------------------------------------------------------------|
| Mental or behavioural disorders due to psychoactive substance use | Opioids                                                                                                                    | ICD-9: 304.0, 304.7, 305.5<br>ICD-10: F11                                                                           |
|                                                                   | Sedatives and hypnotics                                                                                                    | ICD-9: 304.1, 305.4<br>ICD-10: F13                                                                                  |
|                                                                   | Stimulants                                                                                                                 | ICD-9: 304.2, 305.6, 304.4, 305.7<br>ICD-10: F14, F15                                                               |
|                                                                   | Other (alcohol, cannabinoids, hallucinogens, volatile solvents, multiple drug use or use of other psychoactive substances) | ICD-9: 303, 304.3, 304.5, 304.6, 304.8, 304.9, 305.0, 305.2, 305.3, 305.8, 305.9<br>ICD-10: F10, F12, F16, F18, F19 |
| Other psychiatric illness                                         | Depression                                                                                                                 | ICD-9: 311, 296.2, 296.3<br>ICD-10: F32, F33                                                                        |
|                                                                   | Bipolar disorder/ mixed mania                                                                                              | ICD-9: 296.0, 296.1, 296.4, 296.9<br>ICD-10: F31                                                                    |
|                                                                   | Schizophrenia                                                                                                              | ICD-9: 295<br>ICD-10: F20                                                                                           |
|                                                                   | Personality disorders                                                                                                      | ICD-9: 301<br>ICD-10: F60                                                                                           |
|                                                                   | Other psychosis                                                                                                            | ICD-9: 297 - 299<br>ICD-10: F21 – F29                                                                               |
|                                                                   | Pneumonia (excluding aspiration pneumonia)                                                                                 | ICD-9: 480-486, 487.0<br>ICD-10: J10.0, J11.0, J12-J18                                                              |
|                                                                   | Other respiratory illness                                                                                                  | COPD                                                                                                                |
| Asthma                                                            |                                                                                                                            | ICD-9: 493<br>ICD-10: J45                                                                                           |
| Sleep apnea                                                       |                                                                                                                            | ICD-9: 327.23, 780.57<br>ICD-10: G47.3, P28.3                                                                       |
| HIV disease                                                       |                                                                                                                            | ICD-9: 042<br>ICD-10: B20-B24                                                                                       |
| Hepatitis B                                                       | ICD-9: 070.2, 070.3<br>ICD-10: B16, B18.0, B18.1                                                                           |                                                                                                                     |
| Hepatitis C                                                       | ICD-9: 070.41, 070.44, 070.51, 070.54, 070.7<br>ICD-10: B17.1, B18.2                                                       |                                                                                                                     |
| Cancer                                                            | ICD-9: 140-208, 209.0-209.3<br>ICD-10: C00-C96                                                                             |                                                                                                                     |

**Table S5. Prescription opioids**

| Opioids indicated for pain treatment  | Opioid substitution medications                |
|---------------------------------------|------------------------------------------------|
| Buprenorphine (patch only)            | Buprenorphine/ naloxone (trade name: Suboxone) |
| Codeine                               | Methadone                                      |
| Fentanyl                              |                                                |
| Hydromorphone                         |                                                |
| Pethidine (also known as: meperidine) |                                                |
| Morphine                              |                                                |
| Oxycodone                             |                                                |
| Tapentadol                            |                                                |
| Tramadol                              |                                                |

**Table S6.** Influence of readmission for accidental opioid overdose and covariates on encephalopathy, compared to initial admission

| Predictor variable                      |                                   | Adjusted OR<br>(95% CI) |                   |
|-----------------------------------------|-----------------------------------|-------------------------|-------------------|
| <b>Exposure</b>                         |                                   |                         |                   |
| Repeat admission (vs initial admission) |                                   | 0.57 (0.13, 2.49)       |                   |
| <b>Covariates</b>                       |                                   |                         |                   |
| Sex                                     | Female                            | 0.46 (0.26, 0.81)       |                   |
|                                         | Male                              | 1.00                    |                   |
| Age (years)                             | Under 25                          | 1.02 (0.45, 2.28)       |                   |
|                                         | 25 to 39                          | 1.35 (0.72, 2.54)       |                   |
|                                         | 40 to 49                          | 1.00                    |                   |
|                                         | 50 to 59                          | 0.55 (0.24, 1.24)       |                   |
|                                         | 60 to 69                          | 0.27 (0.07, 1.00)       |                   |
|                                         | 70 or above                       | 0.11 (0.02, 0.76)       |                   |
| Cohort entry year                       | 2006                              | 1.00                    |                   |
|                                         | 2007                              | 0.28 (0.05, 1.41)       |                   |
|                                         | 2008                              | 0.52 (0.15, 1.82)       |                   |
|                                         | 2009                              | 0.55 (0.15, 1.97)       |                   |
|                                         | 2010                              | 0.27 (0.05, 1.32)       |                   |
|                                         | 2011                              | 0.77 (0.27, 2.19)       |                   |
|                                         | 2012                              | 1.08 (0.41, 2.87)       |                   |
|                                         | 2013                              | 0.73 (0.27, 2.01)       |                   |
|                                         | 2014                              | 0.51 (0.17, 1.47)       |                   |
| Income                                  | 2015                              | 0.73 (0.28, 1.89)       |                   |
|                                         | Low income                        | 0.44 (0.21, 0.92)       |                   |
|                                         | Mid to high income                | 1.00                    |                   |
|                                         | Residence                         | Rural                   | 0.47 (0.17, 1.32) |
|                                         |                                   | Urban                   | 1.00              |
| Substance use disorders*                | Opioids                           | 0.76 (0.29, 2.03)       |                   |
|                                         | Sedatives and hypnotics           | 0.83 (0.44, 1.58)       |                   |
|                                         | Stimulants                        | 0.77 (0.24, 2.53)       |                   |
| Romano comorbidity score*               | Zero                              | 0.95 (0.51, 1.75)       |                   |
|                                         | 1 to 2                            | 1.00                    |                   |
|                                         | 3 or more                         | 0.74 (0.20, 2.75)       |                   |
| Other medical history*                  | Psychiatric illness               | 0.84 (0.48, 1.48)       |                   |
|                                         | Pneumonia                         | 1.56 (0.60, 4.08)       |                   |
|                                         | Other respiratory illness         | 0.79 (0.35, 1.78)       |                   |
|                                         | Cancer                            | 2.55 (0.66, 9.82)       |                   |
| Opioid prescription history†            | High dose opioid for pain         | 0.32 (0.10, 0.97)       |                   |
|                                         | Low to intermediate dose for pain | 1.00                    |                   |
|                                         | No use of opioids for pain        | 0.95 (0.55, 1.64)       |                   |
| Other prescription history†             | Sedatives and hypnotics           | 0.65 (0.30, 1.42)       |                   |

Readmissions are defined as additional accidental opioid overdose admissions within 365 days of prior admission. \*Based on diagnoses at a physician or hospital visit in the 365 days before opioid overdose. †Based on dispensings in the 180 days prior to opioid overdose. High dose opioid use is defined by a dispensing of opioid pain medication of >90 oral morphine equivalents per day.
